# Supplementary material
Source: Springer Nature journal article supplement (https://www.springermedizin.de/resource/supplementary/12911_2010_403_MOESM4_ESM.pdf/9525658)

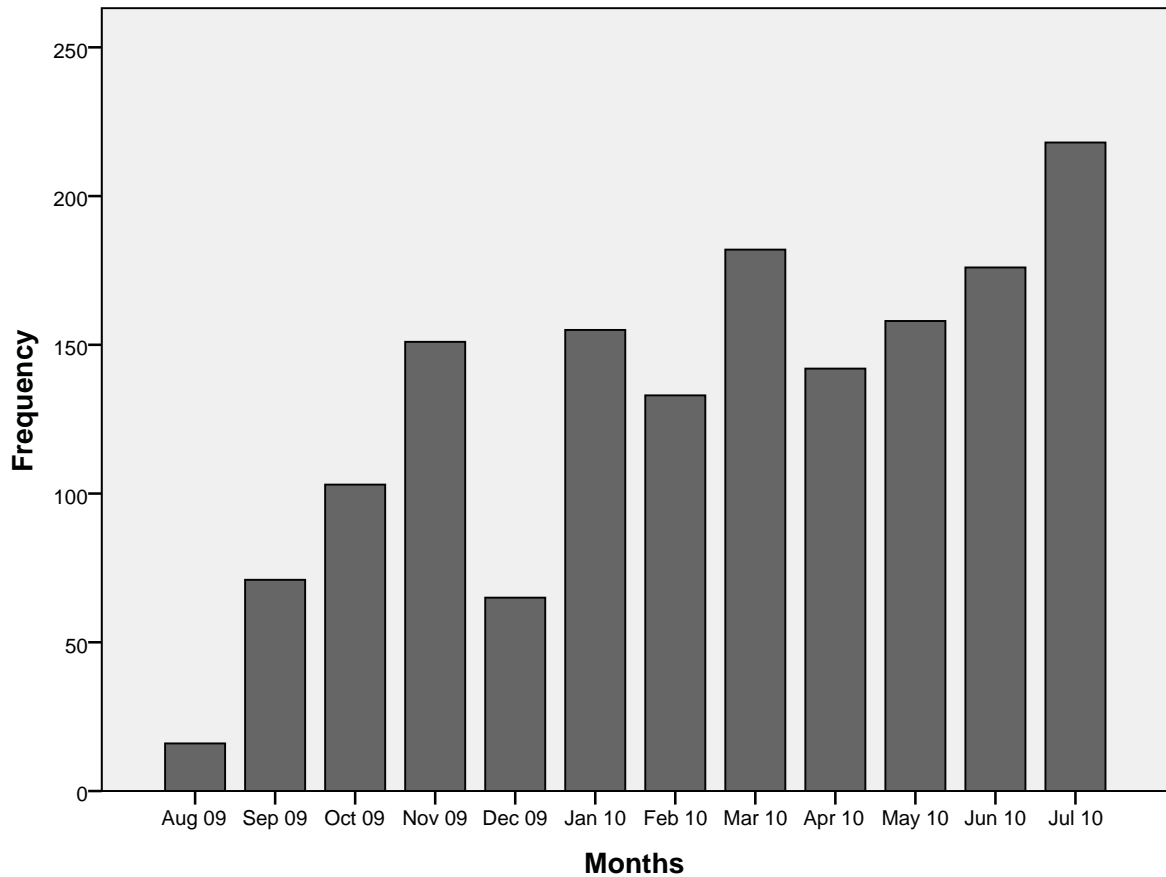

Supplement: MOESM4 [file 9525658]
